# Supplementary material for: Intake of dietary fibre, red and processed meat and risk of late-onset Chronic Inflammatory Diseases: A prospective Danish study on the “diet, cancer and health” cohort
Source: PubMed Central journal article supplement (PMC7532485; doi:10.7150/ijms.49314), 2020-09-09
Supplement: ijmsv17p2487s1.pdf [file ijmsv17p2487s1.pdf]

**Supplemental tables and figure:**

**Supplementary Table S1: Specification of outcome CIDs with associated diagnostic- and treatment codes**

|                                    | <b>Specialized hospital unit</b>                                       | <b>ICD8</b>                              | <b>ICD10</b>                             | <b>Comment</b>                                                                                                                                                       |
|------------------------------------|------------------------------------------------------------------------|------------------------------------------|------------------------------------------|----------------------------------------------------------------------------------------------------------------------------------------------------------------------|
| Chrohn's Disease (CD)              | Surgical Gastroenterology, Medical Gastroenterology, Internal medicine | 563.00, 563.91, 563.02, 563.08, 563.09   | DK50*                                    | Date of diagnosis: First relevant A-diagnosis from specialized hospital department, followed by minimum one diagnosis or ambulant visit within 180 days (RA: 90days) |
| Ulcerative colitis (UC)            | Surgical Gastroenterology, Medical Gastroenterology, Internal medicine | 563.19, 563.99, 569.04                   | DK51*                                    |                                                                                                                                                                      |
| Rheumatoid Arthritis (RA)          | Rheumatology, Internal medicine                                        | 712.19, 712.29, 712.39, 712.59           | DM059, DM060, DM068, DM069               |                                                                                                                                                                      |
| Psoriatic Arthritis (PsA)          | Rheumatology, Internal medicine                                        | 696.09                                   | DM071, DM072, DM073, DM090, DM468        |                                                                                                                                                                      |
| Psoriasis (PsO)                    | Dermato-venerology, Internal medicine                                  | 696.10, 696.19                           | DL40*                                    |                                                                                                                                                                      |
| Multiple Sclerosis (MS)            | ---                                                                    | Nationwide, population-based MS registry | Nationwide, population-based MS registry | Year of diagnosis is given. Date set to mid-year (i.e. yyyy0630)                                                                                                     |
| Inflammatory Bowel Disease (IBD)   | ---                                                                    | CD or UC                                 | CD or UC                                 | Date of diagnosis: Minimum of the dates for CD and UC                                                                                                                |
| Chronic Inflammatory disease (CID) | ---                                                                    | one of the above mentioned               | one of the above mentioned               | Date of diagnosis: Minimum of the above dates                                                                                                                        |

\*including all subcodes

**Supplementary Table S2: Hazard ratios (HR, 95%CI, and p-values) of risk of developing late-onset CID from multiple Cox-regression. Main exposure variable is fibre intake.**

| <b>Covariate</b>          | <b>HR</b>     | <b>95% CI</b> | <b>p-value</b> |
|---------------------------|---------------|---------------|----------------|
| <b>Fibre</b>              |               |               |                |
| <b>Low</b>                | 1.04          | 0.89-1.22     | 0.60           |
| <b>Medium</b>             | 1.04          | 0.91-1.18     | 0.58           |
| <b>High</b>               | 1 (reference) | ---           | ---            |
| <b>Age</b>                | 1.00          | 0.99-1.02     | 0.43           |
| <b>Sex</b>                |               |               |                |
| <b>Male</b>               | 0.70          | 0.62-0.78     | <0.001         |
| <b>Female</b>             | 1 (reference) | ---           | ---            |
| <b>Energy intake</b>      | 1.00          | 0.98-1.03     | 0.98           |
| <b>Alcohol</b>            | 1.00          | 0.99-1.00     | 0.12           |
| <b>Smoking</b>            |               |               |                |
| <b>Never</b>              | 1 (reference) | ---           | ---            |
| <b>Former smoking</b>     | 1.39          | 1.22-1.58     | <0.001         |
| <b>Current smoker</b>     | 1.82          | 1.61-2.04     | <0.001         |
| <b>Education</b>          |               |               |                |
| <b>Less than 8 years</b>  | 1 (reference) | ---           | ---            |
| <b>8-9 years</b>          | 0.97          | 0.88-1.09     | 0.64           |
| <b>10+ years</b>          | 0.92          | 0.80-1.05     | 0.22           |
| <b>Comorbidity</b>        |               |               |                |
| <b>No</b>                 | 1 (reference) | ---           | ---            |
| <b>Yes</b>                | 3.69          | 3.13-4.34     | <0.001         |
| <b>Married/cohabitant</b> |               |               |                |
| <b>No</b>                 | 1 (reference) | ---           | ---            |
| <b>Yes</b>                | 0.99          | 0.89-1.10     | 0.88           |

**Supplementary Table S3: Unadjusted and covariate-adjusted Hazard Ratios (HR (95%CI)) from Cox-analyses on participants identified with a 0.5, 1, and 5 year's delay after interview**

| Exposure                                                                                  | <u>0.5 year delay</u>               |                                      | <u>1 year delay</u>                 |                                      | <u>5 year's delay</u>               |                                      |
|-------------------------------------------------------------------------------------------|-------------------------------------|--------------------------------------|-------------------------------------|--------------------------------------|-------------------------------------|--------------------------------------|
|                                                                                           | Unadjusted HR<br>(95%CI) (N=55,959) | Adjusted ** HR<br>(95%CI) (N=54,194) | Unadjusted HR<br>(95%CI) (N=55,829) | Adjusted ** HR<br>(95%CI) (N=54,072) | Unadjusted HR<br>(95%CI) (N=54,059) | Adjusted ** HR<br>(95%CI) (N=52,435) |
| <b>Number (%) of cases</b>                                                                | 1,719 (3.1)                         |                                      | 1,676 (3.0)                         |                                      | 1,238(2.3)                          |                                      |
| <b>Dietary fibre -<br/>tertiles of g/day</b>                                              |                                     |                                      |                                     |                                      |                                     |                                      |
| Lowest                                                                                    | 1.10 (0.96;1.26)                    | 0.99 (0.83;1.19)                     | 1.12 (1.00;1.26)                    | 1.02 (0.87;1.20)                     | 1.10 (0.96;1.26)                    | 0.99 (0.83;1.19)                     |
| Middle                                                                                    | 1.04 (0.90;1.19)                    | 1.00 (0.86;1.16)                     | 1.05 (0.94;1.19)                    | 1.02 (0.90;1.17)                     | 1.04 (0.90;1.19)                    | 1.00 (0.86;1.16)                     |
| Highest                                                                                   | 1 (ref)                             | 1 (ref)                              | 1 (ref)                             | 1 (ref)                              | 1 (ref)                             | 1 (ref)                              |
| <b>Meat - tertiles of<br/>g/day</b>                                                       |                                     |                                      |                                     |                                      |                                     |                                      |
| Lowest                                                                                    | 1 (ref)                             | 1 (ref)                              | 1 (ref)                             | 1 (ref)                              | 1 (ref)                             | 1 (ref)                              |
| Middle                                                                                    | 1.06 (0.92;1.21)                    | 1.03 (0.89;1.18)                     | 0.99 (0.88;1.12)                    | 0.97 (0.86;1.10)                     | 1.06 (0.92;1.21)                    | 1.03 (0.89;1.18)                     |
| Highest                                                                                   | 1.05 (0.91;1.20)                    | 0.99 (0.85;1.16)                     | 1.01 (0.90;1.13)                    | 0.96 (0.84;1.10)                     | 1.05 (0.91;1.20)                    | 0.99 (0.85;1.16)                     |
| <b>Combined exposure<br/>- combinations of<br/>tertiles of meat and<br/>fibre intake*</b> |                                     |                                      |                                     |                                      |                                     |                                      |
| Low risk <sup>a</sup>                                                                     | 1 (ref)                             | 1 (ref)                              | 1 (ref)                             | 1 (ref)                              | 1 (ref)                             | 1 (ref)                              |
| Medium risk A <sup>b</sup>                                                                | 0.97 (0.84;1.12)                    | 0.92 (0.79;1.08)                     | 1.01 (0.90;1.15)                    | 0.96 (0.84;1.10)                     | 0.97 (0.84;1.12)                    | 0.92 (0.79;1.08)                     |
| Medium risk B <sup>c</sup>                                                                | 1.03 (0.89;1.18)                    | 0.94 (0.80;1.11)                     | 1.08 (0.96;1.22)                    | 1.00 (0.87;1.15)                     | 1.03 (0.89;1.18)                    | 0.94 (0.80;1.11)                     |
| High risk <sup>d</sup>                                                                    | 1.20 (0.98;1.46)                    | 1.05 (0.86;1.29)                     | 1.13 (0.95;1.34)                    | 1.00 (0.83;1.19)                     | 1.20 (0.98;1.46)                    | 1.05 (0.86;1.29)                     |

\***Combined exposure:** <sup>a</sup> low/medium intake of meat and medium/high intake of fibres; <sup>b</sup> high intake of meat and medium/high intake of fibres; <sup>c</sup> low/medium intake of meat and low intake of fibres; <sup>d</sup> high intake of meat and low intake of fibres.

\*\* Model adjusted for age, sex, energy (MJ/day), alcohol intake (g/day), smoking status (never, former, current), education (<8years, 8-9years, >9years), civil status (Living alone, cohabiting), and co-morbidity (Charlson comorbidity index 1+vs 0).

**Supplementary Table S4: Unadjusted Hazard Ratios (HR (95%CI)) for Inflammatory Bowel Disease (IBD), Rheumatoid Arthritis (RA), Psoriasis (PsO), Psoriatic arthritis (PsA) and Multiple sclerosis (MS).**

| <b>Exposure</b>                                                               | <b><u>Inflammatory bowel disease (IBD)</u></b> | <b><u>Rheumatoid arthritis (RA)</u></b> | <b><u>Psoriasis (PsO)</u></b>           | <b><u>Psoriatic arthritis (PsA)</u></b> | <b><u>Multiple sclerosis (MS)</u></b>   |
|-------------------------------------------------------------------------------|------------------------------------------------|-----------------------------------------|-----------------------------------------|-----------------------------------------|-----------------------------------------|
|                                                                               | <b>Unadjusted HR (95%CI) (N=56,351)</b>        | <b>Unadjusted HR (95%CI) (N=56,337)</b> | <b>Unadjusted HR (95%CI) (N=56,349)</b> | <b>Unadjusted HR (95%CI) (N=56,397)</b> | <b>Unadjusted HR (95%CI) (N=56,281)</b> |
| <b>Number (%) of cases</b>                                                    | 542 (1.0)                                      | 799 (1.4)                               | 357 (0.6)                               | 97 (0.2)                                | 50 (0.1)                                |
| <b>Dietary fibre - tertiles of g/day</b>                                      |                                                |                                         |                                         |                                         |                                         |
| Lowest                                                                        | 1.12 (0.91;1.38)                               | 1.09 (0.92;1.29)                        | 1.23 (0.95;1.59)                        | 0.83 (0.52;1.34)                        | 1.48 (0.73;3.00)                        |
| Middle                                                                        | 1.11 (0.90;1.36)                               | 1.05 (0.89;1.25)                        | 1.08 (0.83;1.40)                        | 0.74 (0.45;1.20)                        | 1.38 (0.68;2.82)                        |
| Highest                                                                       | 1 (ref)                                        | 1 (ref)                                 | 1 (ref)                                 | 1 (ref)                                 | 1 (ref)                                 |
| <b>Meat - tertiles of g/day</b>                                               |                                                |                                         |                                         |                                         |                                         |
| Lowest                                                                        | 1 (ref)                                        | 1 (ref)                                 | 1 (ref)                                 | 1 (ref)                                 | 1 (ref)                                 |
| Middle                                                                        | 1.09 (0.89;1.34)                               | 0.87 (0.74;1.03)                        | 1.10 (0.85;1.44)                        | 0.97 (0.59;1.60)                        | 0.95 (0.48;1.87)                        |
| Highest                                                                       | 0.99 (0.80;1.22)                               | 0.91 (0.77;1.07)                        | 1.33 (1.03;1.71)                        | 1.08 (0.67;1.75)                        | 1.01 (0.52;1.98)                        |
| <b>Combined exposure - combinations of tertiles of meat and fibre intake*</b> |                                                |                                         |                                         |                                         |                                         |
| Low risk <sup>a</sup>                                                         | 1 (ref)                                        | 1 (ref)                                 | 1 (ref)                                 | 1 (ref)                                 | 1 (ref)                                 |
| Medium risk A <sup>b</sup>                                                    | 1.05 (0.85;1.31)                               | 0.93 (0.77;1.11)                        | 1.27 (0.98;1.65)                        | 1.00 (0.60;1.65)                        | 1.10 (0.53;2.26)                        |
| Medium risk B <sup>c</sup>                                                    | 1.17 (0.95;1.44)                               | 1.01 (0.85;1.20)                        | 1.20 (0.92;1.57)                        | 0.88 (0.52;1.48)                        | 1.29 (0.65;2.57)                        |
| High risk <sup>d</sup>                                                        | 0.87 (0.62;1.22)                               | 1.10 (0.86;1.41)                        | 1.60 (1.13;1.26)                        | 1.18 (0.59;2.35)                        | 1.29 (0.48;3.44)                        |

\***Combined exposure:** <sup>a</sup> low/medium intake of meat and medium/high intake of fibres; <sup>b</sup> high intake of meat and medium/high intake of fibres; <sup>c</sup> low/medium intake of meat and low intake of fibres; <sup>d</sup> high intake of meat and low intake of fibres.

**Supplemental Figure S1: Unadjusted Hazard Ratios (HR) for developing Chronic Inflammatory Disease (CID) (N=56,075)**

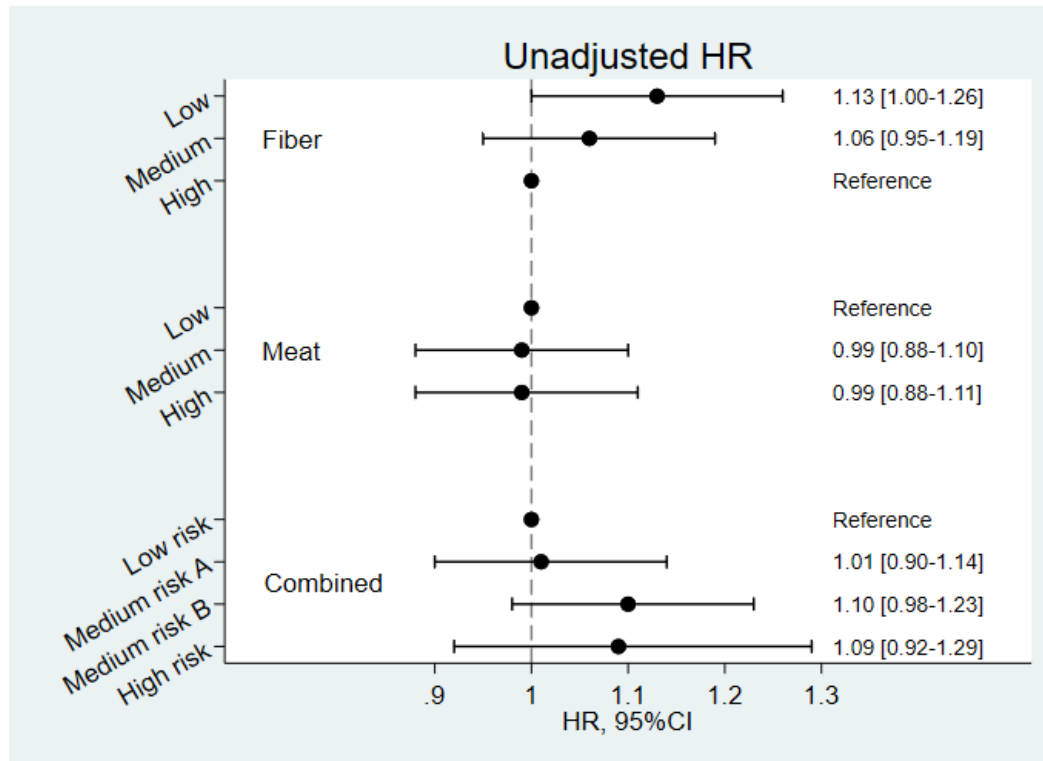

**Combined exposure:** Low risk: low/medium intake of meat and medium/high intake of fibres; Medium risk A: high intake of meat and medium/high intake of fibres; Medium risk B low/medium intake of meat and low intake of fibres; High risk: high intake of meat and low intake of fibres.
